# Supplementary material
Source: PubMed Central journal article supplement (PMC9015270)

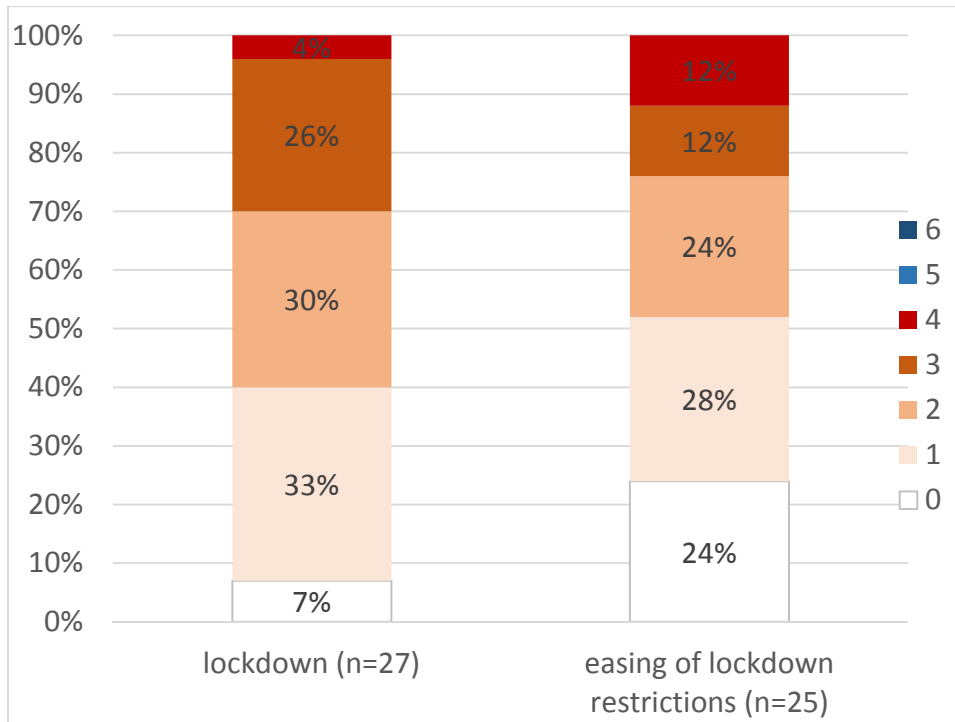

Supplementary figure 1: SINBAD score distribution at both visits.

Supplement: DMRR-38-0-s001.pdf [file DMRR-38-0-s001.pdf]
